# Supplementary material for: Comparative elemental characterization of atmospheric fine and coarse PM samples by PIXE and ICP-MS/MS: results from a one-year measurement campaign in a coal-powered thermal power plant city
Source: Royal Society of Chemistry journal article supplement (doi:10.1039/d2ja00251e), 2022-01-01
Supplement: d2ja00251e1.pdf [file d2ja00251e1.pdf]

## Supplementary Information

### Comparative elemental characterization of atmospheric fine and coarse PM samples by PIXE and ICP-MS/MS: Results from one year measurement campaign in a coal powered thermal power plant city

Abdallah Munir Abdallah Dawood,<sup>ab</sup> Franco Lucarelli,<sup>c</sup> Akif Arı,<sup>da</sup> Emre Can,<sup>a</sup> Pelin Ertürk Arı,<sup>da</sup> Tuncay Döğeroğlu<sup>a</sup> and Eftade O.Gaga<sup>\*a</sup>

<sup>a</sup>*Eskişehir Technical University, Engineering Faculty, Department of Environmental Engineering, 26555, Eskişehir, Türkiye.*

<sup>b</sup>*Radiation Protection Institute (RPI) - Ghana Atomic Energy Commission (GAEC), Accra, Ghana.*

<sup>c</sup>*Department of Physics and Astronomy, University of Florence and I.N.F.N., Florence, Via G. Sansone 1, I-50019 Sesto F.no, Florence, Italy.*

<sup>d</sup>*Bolu Abant İzzet Baysal University, Engineering Faculty, Department of Environmental Engineering, Bolu, Türkiye*

\* *Corresponding author: Eftade O. Gaga, Eskişehir Technical University, Eskişehir-Turkey*

*E-mail: [egaga@eskisehir.edu.tr](mailto:egaga@eskisehir.edu.tr), Telephone: +90 222 3223662/6648, Fax: +90 222 3239501*

#### Content:

**Table S1.** Certified elemental areal concentrations for SRM 2783, together with quoted uncertainties

**Table S2.** Certified and uncertified elemental concentrations in SRM 1648a and average recoveries

**Table S3.** Descriptive statistics for PIXE and ICP-MS/MS for urban data

**Table S4.** Descriptive statistics for PIXE and ICP-MS/MS for rural data

**Table S5.** Calculated MDLs, LOQs and LODs for PIXE method

**Table S6.** Calculated MDLs, LOQs and LODs, with total uncertainties for ICP-MS/MS

**Figure S1-S3.** Distribution of datasets

**Table S1.** Certified elemental areal concentrations for the NIST SRM 2783 standard

| Element | Areal concentration ( $\mu\text{g cm}^{-2}$ ) | Uncertainty ( $\mu\text{g cm}^{-2}$ ) |
|---------|-----------------------------------------------|---------------------------------------|
| Al      | 2.33                                          | 0.05                                  |
| Sb      | 0.0072                                        | 0.0003                                |
| As      | 0.0012                                        | 0.0001                                |
| Ba*     | 0.034                                         | 0.005                                 |
| Ca*     | 1.3                                           | 0.2                                   |
| Co      | 0.0008                                        | 0.0001                                |
| Cu      | 0.041                                         | 0.004                                 |
| Cr*     | 0.014                                         | 0.003                                 |
| Fe      | 2.7                                           | 0.2                                   |
| Mg      | 0.87                                          | 0.05                                  |
| Mn      | 0.032                                         | 0.001                                 |
| Ni      | 0.007                                         | 0.001                                 |
| K       | 0.53                                          | 0.05                                  |
| Rb      | 0.0024                                        | 0.0006                                |
| Sc      | 0.00036                                       | 0.00003                               |
| Si      | 5.9                                           | 0.2                                   |
| Na      | 0.19                                          | 0.01                                  |
| S       | 0.11                                          | 0.03                                  |
| Ti*     | 0.15                                          | 0.02                                  |
| V       | 0.0049                                        | 0.0006                                |
| Zn      | 0.18                                          | 0.01                                  |

*For the elements marked with the asterisk (\*) the concentrations are reference values only*

**Table S2.** Certified and uncertified elemental concentrations in SRM 1648a and average recoveries (n=14)

| <b>Elements</b> | <b>Certified Conc.<br/>(<math>\mu\text{g g}^{-1}</math>)</b> | <b>Analysis Conc.<br/>(<math>\mu\text{g g}^{-1}</math>)</b> | <b>Recovery (%) <math>\pm</math> Std. Dev.<br/>(n=14)</b> |
|-----------------|--------------------------------------------------------------|-------------------------------------------------------------|-----------------------------------------------------------|
| Al              | 34300 $\pm$ 0.13                                             | 32418.9                                                     | 94.5 $\pm$ 15                                             |
| Sb              | 45.4 $\pm$ 1.4                                               | 40.6                                                        | 89.4 $\pm$ 6.1                                            |
| As              | 115.5 $\pm$ 3.9                                              | 120.8                                                       | 104.5 $\pm$ 12.2                                          |
| Br              | 502 $\pm$ 10                                                 | 438.3                                                       | 87.3 $\pm$ 6.8                                            |
| Ca              | 58400 $\pm$ 0.19                                             | 41760.27                                                    | 71.5 $\pm$ 3.4                                            |
| Cd              | 73.7 $\pm$ 2.3                                               | 71.1                                                        | 99.3 $\pm$ 8.6                                            |
| Ce              | 54.6 $\pm$ 2.2                                               | 45.9                                                        | 84.3 $\pm$ 4.7                                            |
| Co              | 17.93 $\pm$ 0.68                                             | 16.9                                                        | 94.5 $\pm$ 7.8                                            |
| Cr              | 402 $\pm$ 13                                                 | 386.4                                                       | 96.1 $\pm$ 9.7                                            |
| Cu              | 610 $\pm$ 70                                                 | 562.8                                                       | 92.3 $\pm$ 11.1                                           |
| Fe              | 39200 $\pm$ 0.21                                             | 38605.8                                                     | 101.4 $\pm$ 11.3                                          |
| Pb              | 6550 $\pm$ 0.033                                             | 6613.8                                                      | 100.9 $\pm$ 9.5                                           |
| Mg              | 9130 $\pm$ 0.01                                              | 8247.1                                                      | 90.4 $\pm$ 13.7                                           |
| Mn              | 790 $\pm$ 44                                                 | 808.9                                                       | 102.3 $\pm$ 10.1                                          |
| Hg              | 1.323 $\pm$ 0.064                                            | 1.04                                                        | 78.3 $\pm$ 13.5                                           |
| Ni              | 81.1 $\pm$ 6.8                                               | 74.7                                                        | 92.3 $\pm$ 20.1                                           |
| K               | 10560 $\pm$ 0.049                                            | 9939.3                                                      | 94.2 $\pm$ 17.6                                           |
| Rb              | 51 $\pm$ 1.5                                                 | 47                                                          | 92.2 $\pm$ 7.3                                            |
| Na              | 4240 $\pm$ 60                                                | 4336.4                                                      | 102.7 $\pm$ 9.3                                           |
| Sr              | 215 $\pm$ 17                                                 | 219.6                                                       | 102.1 $\pm$ 7.4                                           |
| S               | 55100 $\pm$ 0.36                                             | 52889.6                                                     | 95.9 $\pm$ 4.1                                            |
| Ti              | 4021 $\pm$ 86                                                | 3785.9                                                      | 94.2 $\pm$ 11.2                                           |
| V               | 127 $\pm$ 11                                                 | 126.8                                                       | 99.9 $\pm$ 11.6                                           |
| Zn              | 4800 $\pm$ 270                                               | 4970.9                                                      | 103.5 $\pm$ 11.6                                          |

**Table S3.** Descriptive statistics of urban station samples measured by PIXE and ICP-MS/MS

| Element   | Urban Station PM <sub>2.5</sub> |                        |                             |                        |                   |                        | Urban Station PM <sub>2.5-10</sub> |                        |                             |                        |                   |                        |
|-----------|---------------------------------|------------------------|-----------------------------|------------------------|-------------------|------------------------|------------------------------------|------------------------|-----------------------------|------------------------|-------------------|------------------------|
|           | Mean<br>µg/m <sup>3</sup>       |                        | Median<br>µg/m <sup>3</sup> |                        | % BDL             |                        | Mean<br>µg/m <sup>3</sup>          |                        | Median<br>µg/m <sup>3</sup> |                        | % BDL             |                        |
|           | PIXE<br>(N = 141)               | ICP-MS/MS<br>(N = 300) | PIXE<br>(N = 141)           | ICP-MS/MS<br>(N = 300) | PIXE<br>(N = 141) | ICP-MS/MS<br>(N = 300) | PIXE<br>(N = 141)                  | ICP-MS/MS<br>(N = 300) | PIXE<br>(N = 141)           | ICP-MS/MS<br>(N = 300) | PIXE<br>(N = 141) | ICP-MS/MS<br>(N = 300) |
| <b>Na</b> | 0.0253 ±<br>0.0259              | 0.664 ±<br>0.0505      | 0.0206                      | 0.0564                 | 21                | 9                      | 0.0544 ±<br>0.0544                 | 0.1164 ±<br>0.1001     | 0.0406                      | 0.0895                 | 17                | 1                      |
| <b>Mg</b> | 0.0459 ±<br>0.0526              | 0.1038 ±<br>0.0869     | 0.0301                      | 0.0827                 | 17                | 2                      | 0.1709 ±<br>0.1709                 | 0.3776 ±<br>0.2667     | 0.1319                      | 0.3216                 | 14                | 0                      |
| <b>Al</b> | 0.1257 ±<br>0.1523              | 0.1931 ±<br>0.2352     | 0.0819                      | 0.1319                 | 9                 | 1                      | 0.3802 ±<br>0.3802                 | 0.5257 ±<br>0.4178     | 0.3112                      | 0.422                  | 13                | 0.3                    |
| <b>Si</b> | 0.3020 ±<br>0.3332              |                        | 0.2023                      |                        | 8                 |                        | 0.9721 ±<br>0.9721                 |                        | 0.8347                      |                        | 12                |                        |
| <b>P</b>  | 0.0077 ±<br>0.0065              |                        | 0.0067                      |                        | 25                |                        | 0.0147 ±<br>0.0147                 |                        | 0.0132                      |                        | 24                |                        |
| <b>S</b>  | 0.5869 ±<br>0.5395              | 0.7421 ±<br>0.6249     | 0.4543                      | 0.6025                 | 8                 | 1                      | 0.2751 ±<br>0.2751                 | 0.3896 ±<br>0.3112     | 0.2566                      | 0.2929                 | 14                | 0.3                    |
| <b>Cl</b> | 0.0190 ±<br>0.0325              |                        | 0.0159                      |                        | 12                |                        | 0.1101 ±<br>0.1101                 |                        | 0.0814                      |                        | 13                |                        |
| <b>K</b>  | 0.0920 ±<br>0.0915              | 0.1031 ±<br>0.0798     | 0.0727                      | 0.0927                 | 11                | 8                      | 0.2048 ±<br>0.2048                 | 0.1433 ±<br>0.1286     | 0.1812                      | 0.1065                 | 15                | 7                      |
| <b>Ca</b> | 0.3817 ±<br>0.3429              | 0.2614 ±<br>0.3041     | 0.3426                      | 0.2105                 | 4                 | 2                      | 1.9201 ±<br>1.9201                 | 1.2765 ±<br>0.9839     | 1.7343                      | 1.0392                 | 8                 | 0                      |
| <b>Ti</b> | 0.0125 ±<br>0.0134              | 0.0112 ±<br>0.0124     | 0.0102                      | 0.00792                | 10                | 9                      | 0.0363 ±<br>0.0363                 | 0.0303 ±<br>0.0226     | 0.0244                      | 0.0314                 | 17                | 0.3                    |
| <b>V</b>  | 0.0021 ±<br>0.0021              | 0.0022 ±<br>0.0020     | 0.0014                      | 0.00164                | 13                | 0.3                    | 0.0036 ±<br>0.0036                 | 0.0035 ±<br>0.0032     | 0.00269                     | 0.0024                 | 14                | 0                      |
| <b>Cr</b> | 0.0021 ±<br>0.0012              | 0.0045 ±<br>0.0045     | 0.0020                      | 0.00329                | 41                | 0.3                    | 0.0039 ±<br>0.0039                 | 0.0042 ±<br>0.0020     | 0.0037                      | 0.0039                 | 43                | 0                      |
| <b>Mn</b> | 0.0029 ±<br>0.0025              | 0.0031 ±<br>0.0027     | 0.0026                      | 0.00237                | 11                | 1                      | 0.0078 ±<br>0.0078                 | 0.0073 ±<br>0.0055     | 0.0067                      | 0.00599                | 13                | 0                      |
| <b>Fe</b> | 0.1384 ±<br>0.1322              | 0.1564 ±<br>0.1384     | 0.1214                      | 0.1192                 | 17                | 1                      | 0.3884 ±<br>0.3884                 | 0.3595 ±<br>0.2567     | 0.3255                      | 0.3081                 | 16                | 0                      |

*N* = number of samples

*BDL* = below detection limit

**Table S3 (Continued).** Descriptive statistics of urban station samples measured by PIXE and ICP-MS/MS

| Element   | Urban Station PM <sub>2.5</sub> |                            |                             |                               |                      |                            | Urban Station PM <sub>2.5-10</sub> |                            |                             |                   |                            |     |
|-----------|---------------------------------|----------------------------|-----------------------------|-------------------------------|----------------------|----------------------------|------------------------------------|----------------------------|-----------------------------|-------------------|----------------------------|-----|
|           | Mean<br>µg/m <sup>3</sup>       |                            | Median<br>µg/m <sup>3</sup> |                               | % BDL                |                            | Mean<br>µg/m <sup>3</sup>          |                            | Median<br>µg/m <sup>3</sup> |                   | % BDL                      |     |
|           | PIXE<br>(N = 141)               | ICP-<br>MS/MS<br>(N = 300) | PIXE<br>(N =<br>141)        | ICP-<br>MS/MS<br>(N =<br>300) | PIXE<br>(N =<br>141) | ICP-<br>MS/MS<br>(N = 300) | PIXE<br>(N = 141)                  | ICP-<br>MS/MS<br>(N = 300) | PIXE<br>(N =<br>141)        | PIXE<br>(N = 141) | ICP-<br>MS/MS<br>(N = 300) |     |
| <b>Ni</b> | 0.0021 ±<br>0.0015              | 0.0021 ±<br>0.0023         | 0.0020                      | 0.0015                        | 6                    | 1                          | 0.0041 ±<br>0.0041                 | 0.0035 ±<br>0.0042         | 0.004                       | 0.0029            | 12                         | 1   |
| <b>Cu</b> | 0.0016 ±<br>0.0010              | 0.0016 ±<br>0.0022         | 0.0016                      | 0.0011                        | 6                    | 35                         | 0.0028 ±<br>0.0028                 | 0.0024 ±<br>0.0046         | 0.0025                      | 0.0015            | 8                          | 26  |
| <b>Zn</b> | 0.0185 ±<br>0.0111              | 0.0175 ±<br>0.0182         | 0.0175                      | 0.0131                        | 0                    | 2                          | 0.0226 ±<br>0.0226                 | 0.0141 ±<br>0.0129         | 0.0214                      | 0.0104            | 0                          | 2   |
| <b>As</b> | 0.0007 ±<br>0.0008              | 0.0015 ±<br>0.0016         | 0.0005                      | 0.0011                        | 29                   | 1                          | 0.0006 ±<br>0.0006                 | 0.0013 ±<br>0.0013         | 0.0004                      | 0.0009            | 40                         | 1   |
| <b>Se</b> | 0.0004 ±<br>0.0003              | 0.0003 ±<br>0.0004         | 0.0003                      | 0.0003                        | 29                   | 34                         | 0.0002 ±<br>0.0002                 | 0.0002 ±<br>0.0002         | 0.0002                      | 0.0001            | 58                         | 89  |
| <b>Br</b> | 0.0026 ±<br>0.0017              | 0.0031 ±<br>0.0045         | 0.0025                      | 0.0017                        | 10                   | 59                         | 0.0014 ±<br>0.0014                 | 0.0057 ±<br>0.0076         | 0.001                       | 0.0039            | 19                         | 60  |
| <b>Rb</b> | 0.0004 ±<br>0.0005              | 0.0004 ±<br>0.0004         | 0.0002                      | 0.0004                        | 46                   | 2                          | 0.0007 ±<br>0.0007                 | 0.0009 ±<br>0.0006         | 0.0005                      | 0.0007            | 31                         | 0   |
| <b>Sr</b> | 0.0006 ±<br>0.0006              | 0.0014 ±<br>0.0016         | 0.0005                      | 0.0009                        | 24                   | 2                          | 0.0020 ±<br>0.0020                 | 0.0037 ±<br>0.0030         | 0.0017                      | 0.0029            | 19                         | 0.3 |
| <b>Y</b>  | 0.0002 ±<br>0.0002              |                            | 0.0001                      |                               | 72                   |                            | 0.0004 ±<br>0.0004                 |                            | 0.0003                      |                   | 61                         |     |
| <b>Zr</b> | 0.0007 ±<br>0.0008              | 0.0020 ±<br>0.0037         | 0.0005                      | 0.0009                        | 31                   | 33                         | 0.0012 ±<br>0.0012                 | 0.0022 ±<br>0.0024         | 0.001                       | 0.0018            | 29                         | 1   |
| <b>Mo</b> | 0.0002 ±<br>0.0003              | 0.0002 ±<br>0.0002         | 0.0001                      | 0.0002                        | 83                   | 4                          | 0.0002 ±<br>0.0002                 | 0.0002 ±<br>0.0001         | 0.0002                      | 0.0002            | 77                         | 7   |
| <b>Pb</b> | 0.0060 ±<br>0.0115              | 0.0093<br>±0.0355          | 0.0034                      | 0.0039                        | 17                   | 4                          | 0.0060 ±<br>0.0060                 | 0.0082 ±<br>0.0210         | 0.0035                      | 0.0023            | 23                         | 26  |

*N* = number of samples

*BDL* = below detection limit

**Table S4.** Descriptive statistics of rural station samples measured by PIXE and ICP-MS/MS

| Element   | Rural Station PM <sub>2.5</sub> |                        |                             |                        |                   |                        | Rural Station PM <sub>2.5-10</sub> |                        |                             |                        |                   |                        |
|-----------|---------------------------------|------------------------|-----------------------------|------------------------|-------------------|------------------------|------------------------------------|------------------------|-----------------------------|------------------------|-------------------|------------------------|
|           | Mean<br>µg/m <sup>3</sup>       |                        | Median<br>µg/m <sup>3</sup> |                        | % BDL             |                        | Mean<br>µg/m <sup>3</sup>          |                        | Median<br>µg/m <sup>3</sup> |                        | % BDL             |                        |
|           | PIXE<br>(N = 141)               | ICP-MS/MS<br>(N = 300) | PIXE<br>(N = 141)           | ICP-MS/MS<br>(N = 300) | PIXE<br>(N = 141) | ICP-MS/MS<br>(N = 300) | PIXE<br>(N = 141)                  | ICP-MS/MS<br>(N = 300) | PIXE<br>(N = 141)           | ICP-MS/MS<br>(N = 300) | PIXE<br>(N = 141) | ICP-MS/MS<br>(N = 300) |
| <b>Na</b> | 0.0223 ± 0.0243                 | 0.0524 ± 0.0624        | 0.0146                      | 0.0362                 | 22                | 12                     | 0.0376 ± 0.0643                    | 0.1109 ± 0.1115        | 0.0406                      | 0.0759                 | 22                | 5                      |
| <b>Mg</b> | 0.0383 ± 0.0562                 | 0.075 ± 0.1038         | 0.0244                      | 0.05                   | 16                | 6                      | 0.0736 ± 0.0704                    | 0.2174 ± 0.1748        | 0.1319                      | 0.1828                 | 13                | 1                      |
| <b>Al</b> | 0.1462 ± 0.2742                 | 0.1739 ± 0.2642        | 0.0601                      | 0.0984                 | 9                 | 1                      | 0.2119 ± 0.2410                    | 0.4042 ± 0.4215        | 0.3112                      | 0.2706                 | 11                | 1                      |
| <b>Si</b> | 0.3444 ± 0.5472                 | 0.0658 ± 0.0722        | 0.1865                      |                        | 6                 |                        | 0.5346 ± 0.5541                    |                        | 0.8347                      |                        | 9                 |                        |
| <b>P</b>  | 0.0089 ± 0.0061                 |                        | 0.0086                      |                        | 21                |                        | 0.0086 ± 0.0067                    |                        | 0.0132                      |                        | 20                |                        |
| <b>S</b>  | 0.6658 ± 0.5816                 | 0.6824 ± 0.5656        | 0.5508                      | 0.0477                 | 6                 | 22                     | 0.1284 ± 0.1163                    | 0.1809 ± 0.1367        | 0.2566                      | 0.1442                 | 9                 | 0.3                    |
| <b>Cl</b> | 0.0151 ± 0.0096                 |                        | 0.0149                      |                        | 10                |                        | 0.0674 ± 0.1392                    |                        | 0.0814                      |                        | 10                |                        |
| <b>K</b>  | 0.0842 ± 0.0998                 |                        | 0.0565                      | 0.0697                 | 9                 |                        | 0.0976 ± 0.1031                    | 0.1017 ± 0.1114        | 0.1812                      | 0.0718                 | 9                 | 24                     |
| <b>Ca</b> | 0.1804 ± 0.2531                 | 0.1208 ± 0.1642        | 0.1103                      | 0.00694                | 3                 | 2                      | 0.5886 ± 0.5343                    | 0.3666 ± 0.3456        | 1.7343                      | 0.2753                 | 5                 | 2                      |
| <b>Ti</b> | 0.0130 ± 0.0190                 | 0.0118 ± 0.0165        | 0.0064                      | 0.5586                 | 13                | 12                     | 0.0242 ± 0.0246                    | 0.0234 ± 0.0220        | 0.0168                      | 0.0314                 | 11                | 3                      |
| <b>V</b>  | 0.0011 ± 0.0009                 | 0.0009 ± 0.0007        | 0.0008                      | 0.00066                | 19                | 14                     | 0.0013 ± 0.0012                    | 0.00128 ± 0.0009       | 0.0024                      | 0.0010                 | 10                | 0                      |
| <b>Cr</b> | 0.0024 ± 0.0015                 | 0.0047 ± 0.0069        | 0.0022                      | 0.00374                | 61                | 2                      | 0.0038 ± 0.0028                    | 0.00605 ± 0.0046       | 0.0037                      | 0.0049                 | 60                | 15                     |
| <b>Mn</b> | 0.0044 ± 0.0077                 | 0.0031 ± 0.0045        | 0.0022                      | 0.00192                | 11                | 2                      | 0.0056 ± 0.0066                    | 0.00574 ± 0.0049       | 0.0067                      | 0.0043                 | 9                 | 1                      |
| <b>Fe</b> | 0.1514 ± 0.1774                 | 0.1378 ± 0.1592        | 0.0915                      | 0.0929                 | 20                | 1                      | 0.2671 ± 0.2318                    | 0.2986 ± 0.2695        | 0.3255                      | 0.2263                 | 12                | 1                      |

*N = number of samples*

*BDL = below detection limit*

**Table S4 (continued).** Descriptive statistics of rural station samples measured by PIXE and ICP-MS/MS

| Element   | Rural Station PM <sub>2.5</sub> |                            |                             |                            |                      |                               | Rural Station PM <sub>2.5-10</sub> |                        |                             |                            |                      |                            |
|-----------|---------------------------------|----------------------------|-----------------------------|----------------------------|----------------------|-------------------------------|------------------------------------|------------------------|-----------------------------|----------------------------|----------------------|----------------------------|
|           | Mean<br>µg/m <sup>3</sup>       |                            | Median<br>µg/m <sup>3</sup> |                            | % BDL                |                               | Mean<br>µg/m <sup>3</sup>          |                        | Median<br>µg/m <sup>3</sup> |                            | % BDL                |                            |
|           | PIXE<br>(N = 141)               | ICP-<br>MS/MS<br>(N = 300) | PIXE<br>(N =<br>141)        | ICP-<br>MS/MS<br>(N = 300) | PIXE<br>(N =<br>141) | ICP-<br>MS/MS<br>(N =<br>300) | PIXE<br>(N = 141)                  | ICP-MS/MS<br>(N = 300) | PIXE<br>(N =<br>141)        | ICP-<br>MS/MS<br>(N = 300) | PIXE<br>(N =<br>141) | ICP-<br>MS/MS<br>(N = 300) |
| <b>Ni</b> | 0.0027 ±<br>0.0022              | 0.0024 ±<br>0.0022         | 0.0020                      | 0.00167                    | 4                    | 16                            | 0.0045 ±<br>0.0048                 | 0.0043 ±<br>0.0049     | 0.0040                      | 0.00267                    | 8                    | 14                         |
| <b>Cu</b> | 0.0011 ±<br>0.0007              | 0.0031 ±<br>0.0163         | 0.0010                      | 0.00081                    | 5                    | 67                            | 0.0014 ±<br>0.0043                 | 0.0021 ±<br>0.0082     | 0.0025                      | 0.00047                    | 9                    | 81                         |
| <b>Zn</b> | 0.0187 ±<br>0.0101              | 0.0155 ±<br>0.0494         | 0.0176                      | 0.00712                    | 0                    | 31                            | 0.0146 ±<br>0.0088                 | 0.0086 ±<br>0.0215     | 0.0214                      | 0.00503                    | 0                    | 14                         |
| <b>As</b> | 0.0005 ±<br>0.0005              | 0.0008 ±<br>0.0007         | 0.0003                      | 0.00057                    | 30                   | 2                             | 0.0004 ±<br>0.0004                 | 0.0007 ±<br>0.0006     | 0.0004                      | 0.0005                     | 44                   | 1                          |
| <b>Se</b> | 0.0002 ±<br>0.0002              | 0.0001 ±<br>0.0001         | 0.0002                      | 0.00011                    | 49                   | 59                            | 0.0001 ±<br>0.0001                 | 0.0004 ±<br>0.0003     | 0.0002                      | 0.00013                    | 80                   | 98                         |
| <b>Br</b> | 0.0020 ±<br>0.0013              | 0.0048 ±<br>0.0037         | 0.0020                      | 0.00388                    | 6                    | 53                            | 0.0005 ±<br>0.0005                 | 0.0043 ±<br>0.0136     | 0.0010                      | 0.00147                    | 47                   | 78                         |
| <b>Rb</b> | 0.0003 ±<br>0.0004              | 0.0003 ±<br>0.0003         | 0.0001                      | 0.00017                    | 56                   | 4                             | 0.0006 ±<br>0.0008                 | 0.0005 ±<br>0.0005     | 0.0005                      | 0.00036                    | 35                   | 2                          |
| <b>Sr</b> | 0.0006 ±<br>0.0008              | 0.0010 ±<br>0.0015         | 0.0003                      | 0.00059                    | 35                   | 1                             | 0.0010 ±<br>0.0011                 | 0.0023 ±<br>0.0026     | 0.0017                      | 0.00157                    | 21                   | 1                          |
| <b>Y</b>  | 0.0002 ±<br>0.0001              |                            | 0.0001                      |                            | 82                   |                               | 0.0002 ±<br>0.0001                 |                        | 0.0003                      |                            | 75                   |                            |
| <b>Zr</b> | 0.0004 ±<br>0.0004              | 0.0025 ±<br>0.0031         | 0.0003                      | 0.0016                     | 45                   | 55                            | 0.0006 ±<br>0.0006                 | 0.0017 ±<br>0.0019     | 0.0010                      | 0.00106                    | 35                   | 12                         |
| <b>Mo</b> | 0.0001 ±<br>0.0001              | 0.0001 ±<br>0.0001         | 0.0001                      | 0.000095                   | 88                   | 35                            | 0.0002 ±<br>0.0001                 | 0.0002 ±<br>0.0005     | 0.0002                      | 0.00009                    | 81                   | 14                         |
| <b>Pb</b> | 0.0023 ±<br>0.0022              | 0.0021 ±<br>0.0038         | 0.0146                      | 0.00135                    | 30                   | 23                            | 0.0017 ±<br>0.0020                 | 0.0018 ±<br>0.0053     | 0.0035                      | 0.00065                    | 42                   | 78                         |

*N* = number of samples

*BDL* = below detection limit

**Table S5.** Calculated MDLs, LODs and total uncertainties for PIXE method

| ELEMENT | MDL<br>( $\mu\text{g m}^{-3}$ ) | LOD<br>( $\mu\text{g m}^{-3}$ ) | Total uncertainty<br>(%) |
|---------|---------------------------------|---------------------------------|--------------------------|
| Na      | $5.0\text{E}^{-3}$              | $6.9\text{E}^{-1}$              | 5-20                     |
| Mg      | $4.0\text{E}^{-3}$              | $5.5\text{E}^{-1}$              | 5-20                     |
| Al      | $3.0\text{E}^{-3}$              | $4.2\text{E}^{-1}$              | 5-20                     |
| S       | $1.3\text{E}^{-3}$              | $6.2\text{E}^{-1}$              | 5-20                     |
| K       | $4.0\text{E}^{-5}$              | $5.5\text{E}^{-1}$              | 5-20                     |
| Ca      | $4.0\text{E}^{-4}$              | $5.5\text{E}^{-1}$              | 5-20                     |
| Ti      | $9.0\text{E}^{-6}$              | $1.3\text{E}^{-1}$              | 5-20                     |
| V       | $8.0\text{E}^{-6}$              | $1.1\text{E}^{-1}$              | 5-20                     |
| Cr      | $5.0\text{E}^{-6}$              | $6.9\text{E}^{-2}$              | 5-20                     |
| Mn      | $4.0\text{E}^{-6}$              | $5.5\text{E}^{-2}$              | 5-20                     |
| Fe      | $3.0\text{E}^{-4}$              | $4.2\text{E}^{-2}$              | 5-20                     |
| Ni      | $1.0\text{E}^{-4}$              | $1.4\text{E}^{-2}$              | 5-20                     |
| Cu      | $9.0\text{E}^{-5}$              | $1.3\text{E}^{-2}$              | 5-20                     |
| Zn      | $8.0\text{E}^{-5}$              | $1.1\text{E}^{-2}$              | 5-20                     |
| As      | $2.0\text{E}^{-6}$              | $2.8\text{E}^{-2}$              | 5-20                     |
| Se      | $9.0\text{E}^{-6}$              | $1.3\text{E}^{-2}$              | 5-20                     |
| Br      | $8.0\text{E}^{-5}$              | $1.1\text{E}^{-2}$              | 5-20                     |
| Rb      | $4.0\text{E}^{-4}$              | $5.5\text{E}^{-2}$              | 5-20                     |
| Sr      | $2.0\text{E}^{-5}$              | $2.8\text{E}^{-2}$              | 5-20                     |
| Mo      | $1.5\text{E}^{-4}$              | $2.1\text{E}^{-1}$              | 5-20                     |
| Pb      | $2.0\text{E}^{-3}$              | $6.9\text{E}^{-1}$              | 5-20                     |

*MDL: Method detection limit*

*LOD: Limit of determination*

*Average sampling volume = 825 m<sup>3</sup>*



**Table S6.** Calculated MDLs, LODs and total uncertainties for ICP-MS/MS

| <b>Elements</b> | <b>MDL<br/>(<math>\mu\text{g m}^{-3}</math>)</b> | <b>LOD<br/>(<math>\text{ng mL}^{-1}</math>)</b> | <b>Total uncertainty<br/>(%)</b> |
|-----------------|--------------------------------------------------|-------------------------------------------------|----------------------------------|
| Na              | $4.8 \times 10^{-5}$                             | 40                                              | 9%                               |
| Mg              | $1.3 \times 10^{-5}$                             | 11                                              | 9.2%                             |
| Al              | $7.6 \times 10^{-6}$                             | 6.25                                            | 6.6%                             |
| S               | $8.5 \times 10^{-5}$                             | 70.25                                           | 6.7%                             |
| K               | $6.9 \times 10^{-5}$                             | 57.25                                           | 6%                               |
| Ca              | $1.3 \times 10^{-5}$                             | 11                                              | 2%                               |
| Ti              | $5.1 \times 10^{-6}$                             | 4.25                                            | 1.2%                             |
| V               | $4.2 \times 10^{-7}$                             | 0.35                                            | 9.6%                             |
| Cr              | $5.5 \times 10^{-7}$                             | 0.45                                            | 3.6%                             |
| Mn              | $6.7 \times 10^{-7}$                             | 0.55                                            | 1.2%                             |
| Fe              | $2.1 \times 10^{-5}$                             | 0.69                                            | 9%                               |
| Ni              | $4.8 \times 10^{-7}$                             | 17.25                                           | 7%                               |
| Cu              | $7.0 \times 10^{-6}$                             | 0.40                                            | 0.2%                             |
| Zn              | $2.9 \times 10^{-6}$                             | 5.75                                            | 5%                               |
| As              | $6.0 \times 10^{-8}$                             | 2.38                                            | 8%                               |
| Se              | $1.2 \times 10^{-6}$                             | 0.05                                            | 8.8%                             |
| Br              | $2.5 \times 10^{-5}$                             | 1.03                                            | 8%                               |
| Rb              | $3.9 \times 10^{-7}$                             | 20.25                                           | 2%                               |
| Sr              | $2.4 \times 10^{-7}$                             | 0.20                                            | 5%                               |
| Mo              | $2.0 \times 10^{-6}$                             | 1.73                                            | 6%                               |
| Pb              | $5.8 \times 10^{-6}$                             | 4.75                                            | 9%                               |

*LOD: Limit of determination*

*MDL: Method detection limit*

*Average sampling volume =  $825 \text{ m}^3$*

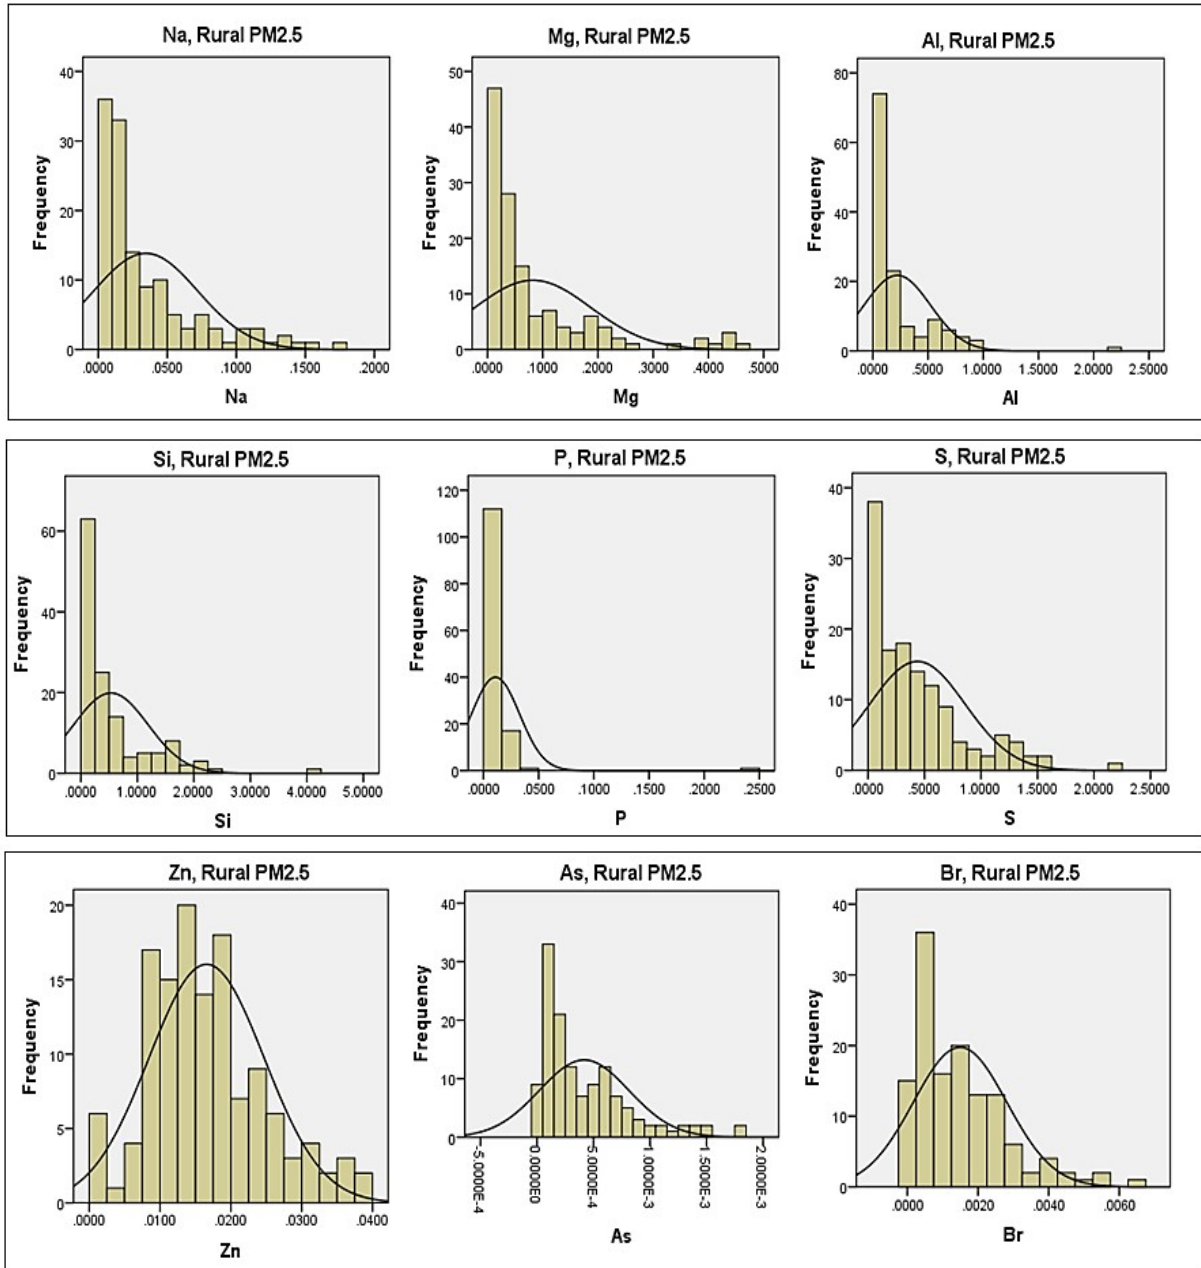

Figure S1. Distribution of selected crustal and anthropogenic source elements in rural-fine PM

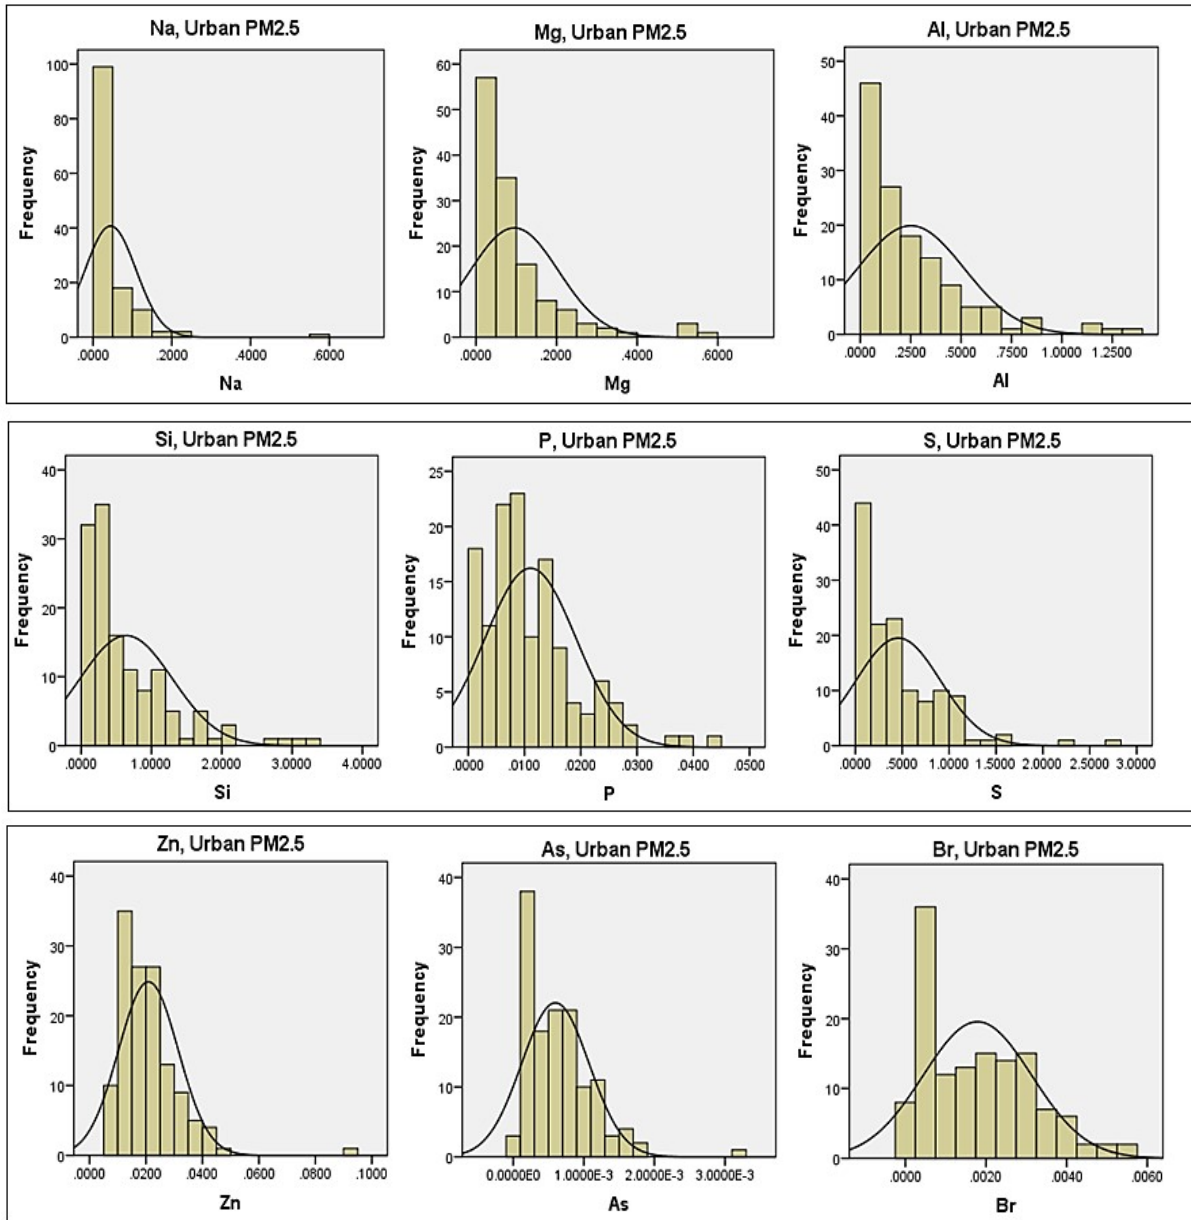

Figure S2. Distribution of selected crustal and anthropogenic source elements in urban-fine PM

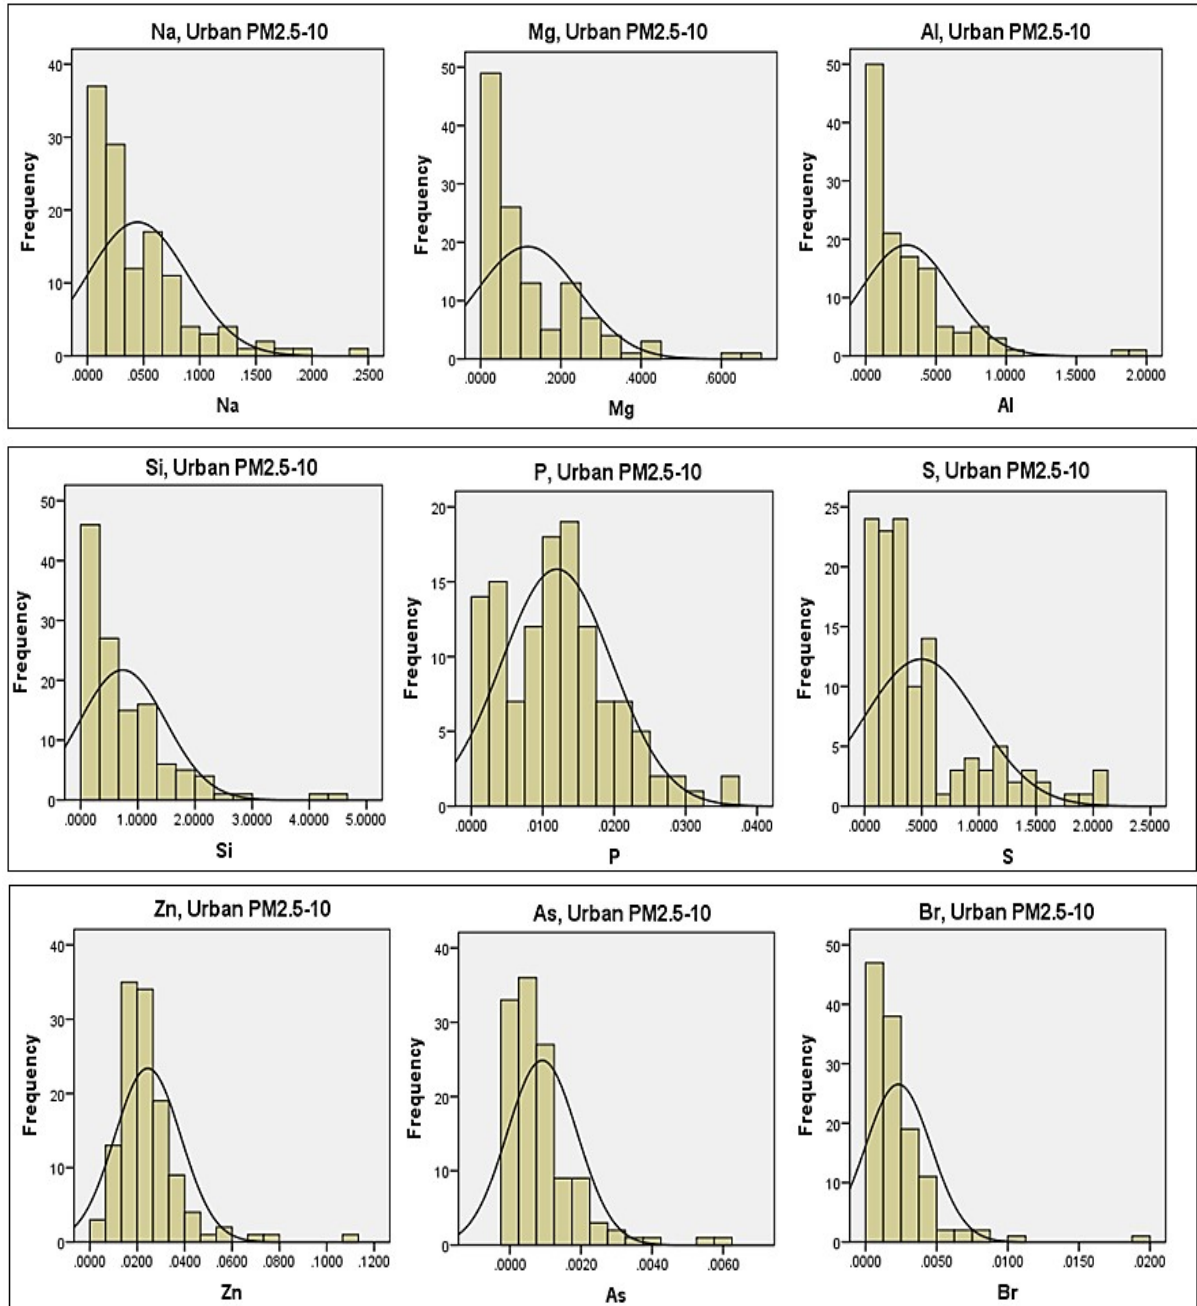

**Fig**

**ure S3.** Distribution of selected crustal and anthropogenic source elements in urban-coarse PM
